# Supplementary material for: Simultaneous emergence of active turbulence and odd viscosity in a colloidal chiral active system
Source: Springer Nature journal article supplement (doi:10.1038/s42005-023-01442-3), 2023-11-11
Supplement: 42005_2023_1442_MOESM1_ESM.pdf [file 42005_2023_1442_MOESM1_ESM.pdf]

## Peer Review File

---

Simultaneous emergence of active turbulence and odd viscosity in a colloidal chiral active system

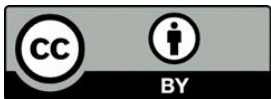

**Open Access** This file is licensed under a Creative Commons Attribution 4.0 International License, which permits use, sharing, adaptation, distribution and reproduction in any medium or format, as long as you give appropriate credit to the original author(s) and the source, provide a link to the Creative Commons license, and indicate if changes were made. In the cases where the authors are anonymous, such as is the case for the reports of anonymous peer reviewers, author attribution should be to 'Anonymous Referee' followed by a clear attribution to the source work. The images or other third party material in this file are included in the article's Creative Commons license, unless indicated otherwise in a credit line to the material. If material is not included in the article's Creative Commons license and your intended use is not permitted by statutory regulation or exceeds the permitted use, you will need to obtain permission directly from the copyright holder. To view a copy of this license, visit <http://creativecommons.org/licenses/by/4.0/>.

*This manuscript has been previously reviewed at another Nature Portfolio journal. The manuscript was considered suitable for publication without further review at Communications Physics*
