# Supplementary material for: Simultaneous emergence of active turbulence and odd viscosity in a colloidal chiral active system
Source: Springer Nature journal article supplement (doi:10.1038/s42005-023-01442-3), 2023-11-11
Supplement: 42005_2023_1442_MOESM2_ESM.pdf [file 42005_2023_1442_MOESM2_ESM.pdf]

## Description of Additional Supplementary Files

**File name:** Supplementary Movie 1

**Description:** Orbital rotation of two hydrodynamically interacting rotors: comparison of experiments and simulations.

**File name:** Supplementary Movie 2

**Description:** Rotors and tracer trajectories in the dilute case (density 0.007) for both experiments and simulations showing Brownian motion, orbital rotation, and induced propulsion.

**File name:** Supplementary Movie 3

**Description:** Rotors and tracer trajectories in the semi-dilute case for both experiments (density 0.031) and simulations (density 0.04) showing induced propulsion and multi-vortex formation.

**File name:** Supplementary Movie 4

**Description:** Rotors and tracer trajectories in the dense collective case for both experiments (density 0.144) and simulations (density 0.14) showing fully developed active turbulence and odd viscosity.

**File name:** Supplementary Movie 5

**Description:** Multiscale vortex formation and density-correlations from simulations: simultaneous time development of rotors trajectories, vorticity, and density fields displayed for one simulation with density 0.14.
